# Supplementary material for: Transition of iPB-1 with low molecular weight crystallized from solutions
Source: Royal Society of Chemistry journal article supplement (doi:10.1039/d4sm00369a), 2024-01-01
Supplement: d4sm00369a1.pdf [file d4sm00369a1.pdf]

Supporting information for

Transition of iPB-1 with low molecular weight deposited from solution

Jiixin Huo, Jingqing Li, Shichun Jiang\*

School of Materials Science and Engineering, Tianjin University, Tianjin 300072, P. R.

China

\* Corresponding author: [scjiang@tju.edu.cn](mailto:scjiang@tju.edu.cn)

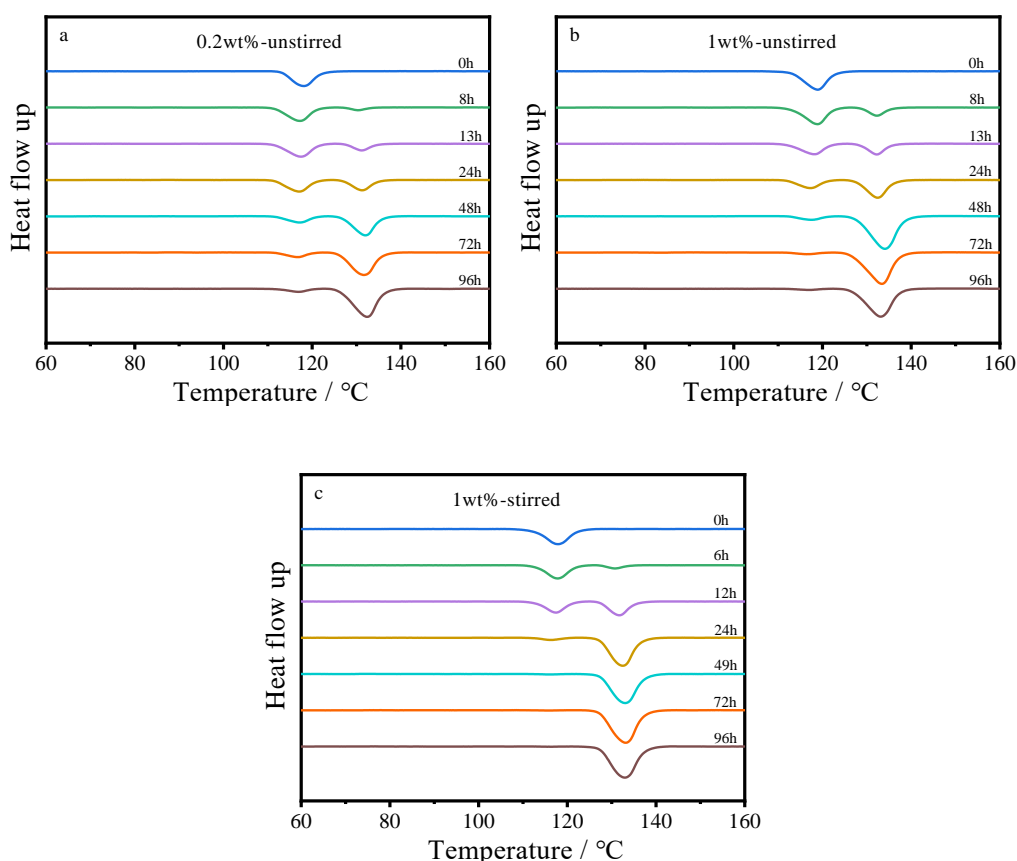

**Figure S1.** DSC heating curves of the solution deposited F1400 samples (a) 0.2wt%-unstirred, (b) 1wt%-unstirred and (c) 1wt%-stirred after heat treatment and annealed for different time

### X-ray measurements

The in-situ simultaneous small angle and wide angle X-ray scattering (SAXS / WAXS) measurements were performed during heating and cooling the F1400 samples at the beamline BL16B1 of the Shanghai Synchrotron Radiation Facility (SSRF,  $\lambda = 0.124$  nm). The sample-to-detector distances were 2198 mm (SAXS) and 179 mm (WAXS). The exposure time was 5.9 s, the pixel size was  $1475 \times 1679$ , and the size of each pixel dot was  $172 \times 172$   $\mu\text{m}$ . The recorded data was background-corrected and integrated by using Fit2D software.

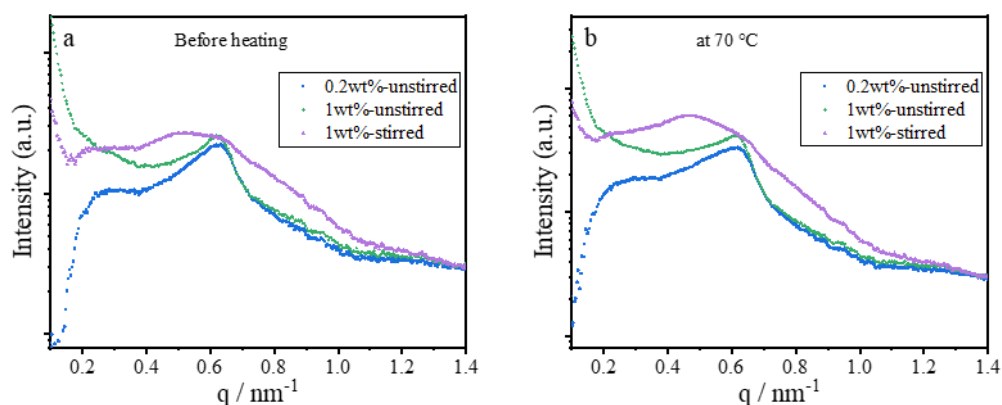

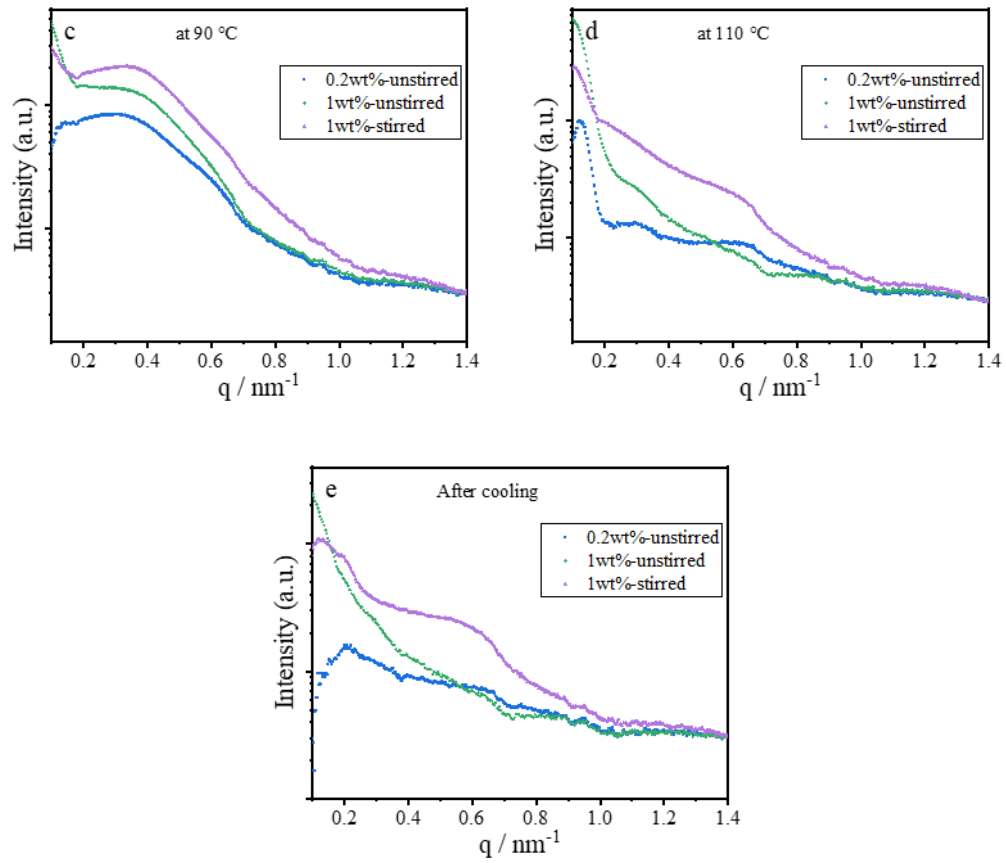

**Figure S2.** Selected SAXS profiles of the solution deposited F1400 samples during heating and after cooling to room temperature for the transition

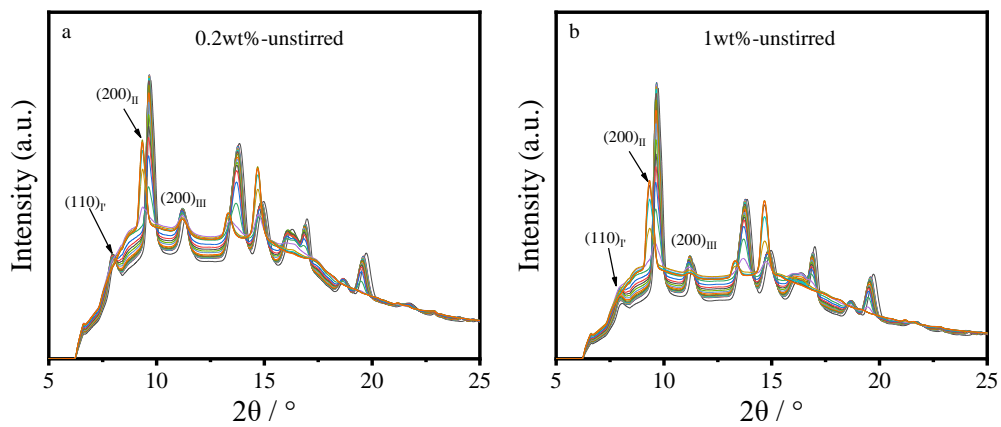

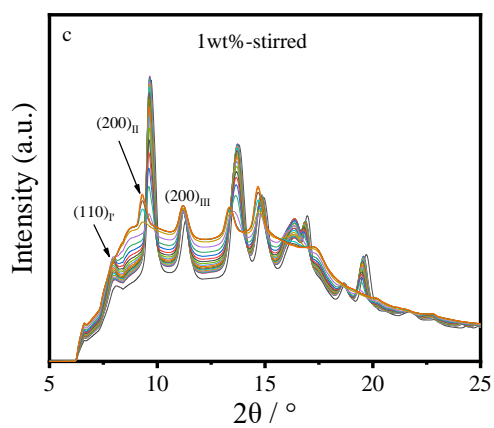

**Figure S3.** WAXS profiles during heating of (a) 0.2wt%-unstirred; (b) 1wt%-unstirred and (c) 1wt%-stirred
